# Supplementary material for: Two bis-ligand-coordinated Zn(ii)-MOFs for luminescent sensing of ions, antibiotics and pesticides in aqueous solutions
Source: Royal Society of Chemistry journal article supplement (doi:10.1039/d2ra00376g), 2022-01-01
Supplement: d2ra00376g1.pdf [file d2ra00376g1.pdf]

## Two Bisligand-Coordinated Zn(II)-MOFs for Luminescent Sensing of Ions, Antibiotics and Pesticides in Aqueous Solutions

Zhao-Di Zhou, Shi-Qi Li, Yin Liu, Bin Du, Yuan-Yue Shen, Bao-Yi Yu\* and Chong-Chen Wang\*

**Table S1** Crystal data for **Zn-1** and **Zn-2**

| CCDC No.                                                                  | 2082187                                                                         | 2082188                                                                       |
|---------------------------------------------------------------------------|---------------------------------------------------------------------------------|-------------------------------------------------------------------------------|
| Formula                                                                   | C <sub>54</sub> H <sub>46</sub> N <sub>28</sub> O <sub>18</sub> Zn <sub>3</sub> | C <sub>33</sub> H <sub>19</sub> N <sub>7</sub> O <sub>8</sub> Zn <sub>2</sub> |
| Formula weight                                                            | 1571.30                                                                         | 772.29                                                                        |
| Temperature/K                                                             | 150.0(1)                                                                        | 150.0(1)                                                                      |
| Crystal system                                                            | triclinic                                                                       | orthorhombic                                                                  |
| Space group                                                               | P $\bar{1}$                                                                     | P2 <sub>1</sub> 2 <sub>1</sub> 2 <sub>1</sub>                                 |
| <i>a</i> / Å                                                              | 10.1500(8)                                                                      | 7.6389(9)                                                                     |
| <i>b</i> / Å                                                              | 11.7115(10)                                                                     | 17.543(2)                                                                     |
| <i>c</i> / Å                                                              | 13.2760(12)                                                                     | 23.531(3)                                                                     |
| $\alpha$ / °                                                              | 81.779(3)                                                                       | 90.000(2)                                                                     |
| $\beta$ / °                                                               | 72.548(2)                                                                       | 90                                                                            |
| $\gamma$ / °                                                              | 87.653(3)                                                                       | 90.000(2)                                                                     |
| <i>V</i> / Å <sup>3</sup>                                                 | 1490.0(2)                                                                       | 3153.4(7)                                                                     |
| <i>Z</i>                                                                  | 1                                                                               | 4                                                                             |
| $\rho_{\text{calc}}$ [g/cm <sup>3</sup> ]                                 | 1.751                                                                           | 1.627                                                                         |
| $\mu$ / mm <sup>-1</sup>                                                  | 1.300                                                                           | 1.587                                                                         |
| F(000)                                                                    | 800.0                                                                           | 1560.0                                                                        |
| Crystal size/mm <sup>3</sup>                                              | 0.19×0.17×0.11                                                                  | 0.15 × 0.11 × 0.1                                                             |
| Radiation                                                                 | MoK $\alpha$ ( $\lambda$ = 0.71073)                                             | MoK $\alpha$ ( $\lambda$ = 0.71073)                                           |
| 2 $\theta$ range for data                                                 | 4.206 to 52.968                                                                 | 4.168 to 52.966                                                               |
| Index ranges                                                              | -12 ≤ <i>h</i> ≤ 12, -14 ≤ <i>k</i> ≤ 14, -16 ≤ <i>l</i> ≤ 16                   | -9 ≤ <i>h</i> ≤ 9, -21 ≤ <i>k</i> ≤ 21, -29 ≤ <i>l</i> ≤ 29                   |
| Reflections collected                                                     | 17126                                                                           | 26810                                                                         |
| Independent reflections                                                   | 6096 [ <i>R</i> <sub>int</sub> = 0.0724, <i>R</i> <sub>sigma</sub> = 0.0831]    | 6416 [ <i>R</i> <sub>int</sub> = 0.1640, <i>R</i> <sub>sigma</sub> = 0.1649]  |
| Data/restraints/parameters                                                | 6096/453/518                                                                    | 6416/780/534                                                                  |
| Goodness-of-fit on <i>F</i> <sup>2</sup>                                  | 1.063                                                                           | 1.035                                                                         |
| Final <i>R</i> indexes [ <i>I</i> ≥ 2 $\sigma$ ( <i>I</i> )] <sup>a</sup> | <i>R</i> <sub>1</sub> = 0.0646, <i>wR</i> <sub>2</sub> = 0.1644                 | <i>R</i> <sub>1</sub> = 0.1202, <i>wR</i> <sub>2</sub> = 0.2991               |
| Final <i>R</i> indexes [all data] <sup>b</sup>                            | <i>R</i> <sub>1</sub> = 0.1059, <i>wR</i> <sub>2</sub> = 0.1956                 | <i>R</i> <sub>1</sub> = 0.2132, <i>wR</i> <sub>2</sub> = 0.3545               |
| Largest diff. peak/hole / e Å <sup>-3</sup>                               | 1.27/-0.72                                                                      | 1.91/-0.92                                                                    |

[a]  $R_1 = \sum |F_o| - |F_c| / \sum |F_o|$ ; [b]  $wR_2 = [\sum [w(F_o^2 - F_c^2)^2] / \sum [(F_o^2)^2]]^{1/2}$ .

**Table S2** The selected bond lengths [Å] and angles [°] for **Zn-1**

|                                       |          |              |          |                        |           |            |          |
|---------------------------------------|----------|--------------|----------|------------------------|-----------|------------|----------|
| Zn1O1W <sup>#1</sup>                  | 2.137(4) | N9C19        | 1.307(8) | N1C10                  | 1.320(7)  | C1C2       | 1.501(7) |
| Zn1O1W                                | 2.137(4) | N10C20       | 1.347(7) | N1C11                  | 1.361(7)  | C2C3       | 1.380(7) |
| Zn1O5                                 | 2.028(3) | N10C21       | 1.413(7) | N2N3                   | 1.377(6)  | C2C7       | 1.398(7) |
| Zn1O5 <sup>#1</sup>                   | 2.028(3) | N11C22       | 1.341(8) | N2C10                  | 1.331(7)  | C3C4       | 1.387(7) |
| Zn1N8                                 | 2.224(5) | N11C23       | 1.337(8) | N2C12                  | 1.421(7)  | C4C5       | 1.394(7) |
| Zn1N8 <sup>#1</sup>                   | 2.224(5) | N12C27       | 1.38(2)  | N3C11                  | 1.294(7)  | C4C8       | 1.495(7) |
| Zn2O1                                 | 1.965(4) | N12C24       | 1.41(2)  | N4C15                  | 1.317(7)  | C5C6       | 1.393(7) |
| Zn2O4 <sup>#2</sup>                   | 1.997(4) | N12N13       | 1.34(2)  | N4C16                  | 1.336(7)  | C6C7       | 1.394(7) |
| Zn2N1                                 | 2.005(5) | N12AN13A     | 1.40(2)  | N5N6                   | 1.377(6)  | C6C9       | 1.513(7) |
| Zn2N7 <sup>#3</sup>                   | 2.003(4) | N12AC24      | 1.49(2)  | N5C14                  | 1.421(7)  | C12C13     | 1.382(7) |
| O1C1                                  | 1.281(6) | N12AC27A     | 1.33(2)  | N5C17                  | 1.331(7)  | C12C16     | 1.383(8) |
| O2C1                                  | 1.243(6) | C27N14       | 1.30(2)  | N6C18                  | 1.309(7)  | C13C14     | 1.378(8) |
| O3C8                                  | 1.250(6) | N13AC26A     | 1.34(2)  | N7Zn2 <sup>#5</sup>    | 2.003(4)  | C14C15     | 1.385(8) |
| O4Zn2 <sup>#4</sup>                   | 1.997(3) | C26N13       | 1.38(2)  | N7C17                  | 1.322(7)  | C21C22     | 1.376(8) |
| O4C8                                  | 1.281(6) | C26N14       | 1.30(2)  | N7C18                  | 1.352(7)  | C21C25     | 1.405(8) |
| O5C9                                  | 1.266(6) | N14AC26A     | 1.28(2)  | N8C19                  | 1.365(7)  | C23C24     | 1.372(8) |
| O6C9                                  | 1.244(6) | N14AC27A     | 1.35(2)  | N8C20                  | 1.315(7)  | C24C25     | 1.383(8) |
| N9N10                                 | 1.374(6) |              |          |                        |           |            |          |
| O1WZn1O1W <sup>#1</sup>               | 180.0(2) | C26AN13AN12A | 100(1)   | N3N2C12                | 121.2(4)  | C13C12C16  | 120.4(5) |
| O1W <sup>#1</sup> Zn1N8 <sup>#1</sup> | 87.1(2)  | N14C26N13    | 103(1)   | C10N2N3                | 109.7(4)  | C16C12N2   | 119.8(5) |
| O1W <sup>#1</sup> Zn1N8               | 92.9(2)  | C26AN14AC27A | 105(1)   | C10N2C12               | 129.0(4)  | C14C13C12  | 116.6(5) |
| O1WZn1N8 <sup>#1</sup>                | 92.9(2)  | O1C1C2       | 117.2(4) | C11N3N2                | 102.4(4)  | C13C14N5   | 120.0(5) |
| O1WZn1N8                              | 87.1(2)  | O2C1O1       | 122.4(5) | C15N4C16               | 117.9(5)  | C13C14C15  | 119.8(5) |
| O5Zn1O1W <sup>#1</sup>                | 93(1)    | O2C1C2       | 120.3(5) | N6N5C14                | 121.1(4)  | C15C14N5   | 120.1(5) |
| O5 <sup>#1</sup> Zn1O1W <sup>#1</sup> | 87.0(1)  | C3C2C1       | 118.7(4) | C17N5N6                | 110.0(4)  | N4C15C14   | 123.2(6) |
| O5 <sup>#1</sup> Zn1O1W               | 93(1)    | C3C2C7       | 120.3(5) | C17N5C14               | 128.9(5)  | N4C16C12   | 122.1(5) |
| O5Zn1O1W                              | 87.0(1)  | C7C2C1       | 120.9(5) | C18N6N5                | 102.1(4)  | N7C17N5    | 109.4(5) |
| O5Zn1O5 <sup>#1</sup>                 | 180.0    | C2C3C4       | 121.3(5) | C17N7Zn2 <sup>#5</sup> | 127.0(4)  | N6C18N7    | 114.7(5) |
| O5Zn1N8 <sup>#1</sup>                 | 90.9(2)  | C3C4C5       | 118.6(5) | C17N7C18               | 103.9(4)  | N9C19N8    | 115.8(5) |
| O5Zn1N8                               | 89.2(2)  | C3C4C8       | 120.6(4) | C18N7Zn2 <sup>5</sup>  | 129.0(4)  | N8C20N10   | 110.4(5) |
| O5 <sup>#1</sup> Zn1N8                | 90.9(2)  | C5C4C8       | 120.8(5) | C19N8Zn1               | 126.9(4)  | C22C21N10  | 121.6(5) |
| O5 <sup>#1</sup> Zn1N8 <sup>#1</sup>  | 89.2(2)  | C6C5C4       | 120.6(5) | C20N8Zn1               | 127.0(4)  | C22C21C25  | 119.1(6) |
| N8Zn1N8 <sup>#1</sup>                 | 180.0(1) | C5C6C7       | 120.3(5) | C20N8C19               | 102.5(5)  | C25C21N10  | 119.2(5) |
| O1Zn2O4 <sup>#2</sup>                 | 99.1(1)  | C5C6C9       | 119.6(4) | C19N9N10               | 101.8(4)  | N11C22C21  | 123.7(6) |
| O1Zn2N1                               | 117(2)   | C7C6C9       | 120.1(5) | N9N10C21               | 120.2(5)  | N11C23C24  | 122.3(6) |
| O1Zn2N7 <sup>#3</sup>                 | 110.9(2) | C6C7C2       | 118.9(5) | C20N10N9               | 109.5(5)  | C23C24N12  | 116.2(9) |
| O4 <sup>#2</sup> Zn2N1                | 103.4(2) | O3C8O4       | 122.4(5) | C20N10C21              | 129.5(5)  | C23C24N12A | 123.8(9) |
| O4 <sup>#2</sup> Zn2N7 <sup>#3</sup>  | 107.4(2) | O3C8C4       | 119.8(4) | C23N11C22              | 117.4(5)  | C23C24C25  | 121.3(6) |
| N7 <sup>#3</sup> Zn2N1                | 116.7(2) | O4C8C4       | 117.8(4) | C27N12C24              | 119.4(13) | C25C24N12  | 121.3(9) |
| C1O1Zn2                               | 105.0(3) | O5C9C6       | 115.6(4) | N13N12C27              | 114.0(14) | C25C24N12A | 114.1(8) |
| C8O4Zn2 <sup>#4</sup>                 | 111.5(3) | O6C9O5       | 125.7(5) | N13N12C24              | 126.2(14) | C24C25C21  | 116.2(5) |
| C9O5Zn1                               | 130.2(3) | O6C9C6       | 118.7(5) | N13AN12AC24            | 123(1)    | N12N13C26  | 105(1)   |

|          |          |          |          |              |        |              |        |
|----------|----------|----------|----------|--------------|--------|--------------|--------|
| C10N1Zn2 | 123.4(4) | N1C10N2  | 109.6(4) | C27AN12AN13A | 110(1) | N14AC26AN13A | 117(1) |
| C10N1C11 | 103.4(4) | N3C11N1  | 114.9(5) | C27AN12AC24  | 126(1) | C27N14C26    | 120(2) |
| C11N1Zn2 | 130.8(4) | C13C12N2 | 119.8(5) | N14C27N12    | 98(1)  | N12AC27AN14A | 109(1) |

Symmetry transformation: #1 1-X, 1-Y, 2-Z; #2 -1+X, +Y, +Z; #3 +X, 1+Y, +Z; #4 1+X, +Y, +Z; #5 +X, -1+Y, +Z.

**Table S3** The selected bond lengths [Å] and angles [°] for Zn-2

|                     |          |                                      |         |                          |         |                                      |         |
|---------------------|----------|--------------------------------------|---------|--------------------------|---------|--------------------------------------|---------|
| Zn1O1               | 2.03(2)  | C27C28                               | 1.41(3) | N2C25                    | 1.33(3) | C22AC23A                             | 1.3900  |
| Zn1O8               | 2.07(2)  | C28C29                               | 1.35(3) | N3C28                    | 1.38(3) | C9AC10A                              | 1.46(7) |
| Zn1O7               | 2.02(2)  | C17C18                               | 1.43(3) | N3C26                    | 1.49(3) | C9AC8A                               | 1.31(7) |
| Zn1O2A              | 2.09(6)  | C17C20                               | 1.51(3) | N4C27 <sup>#5</sup>      | 1.29(3) | C9C8                                 | 1.3900  |
| Zn1O2               | 2.10(6)  | C17C16                               | 1.43(3) | N4C31 <sup>#5</sup>      | 1.33(3) | C9C10                                | 1.3900  |
| Zn1N4               | 2.13(2)  | C2C3                                 | 1.33(4) | N1C25                    | 1.38(3) | C8C7                                 | 1.3900  |
| Zn2O5               | 1.96(2)  | C2C1                                 | 1.48(3) | N1C26                    | 1.30(3) | C7C6                                 | 1.3900  |
| Zn2O3               | 1.92(2)  | C2C7                                 | 1.46(3) | N6N5                     | 1.4200  | C6C11                                | 1.3900  |
| Zn2O6               | 1.97(4)  | C29C30                               | 1.52(4) | N6C33                    | 1.4200  | C6C5                                 | 1.33(3) |
| Zn2O6A              | 1.98(4)  | C3C4                                 | 1.45(4) | N5C32                    | 1.4200  | C11C10                               | 1.3900  |
| Zn2N1               | 1.98(2)  | C3C8A                                | 1.50(6) | N5C30                    | 1.32(4) | C20O8 <sup>#5</sup>                  | 1.27(3) |
| O1C1                | 1.27(3)  | C1O2A <sup>#7</sup>                  | 1.26(7) | C32N7                    | 1.4200  | C20O7 <sup>#8</sup>                  | 1.34(3) |
| O8C20 <sup>#1</sup> | 1.27(3)  | C1O2 <sup>#7</sup>                   | 1.21(7) | N7C33                    | 1.4200  | C12C5                                | 1.50(3) |
| O5C13               | 1.25(3)  | C11AC10A                             | 1.27(7) | N1AN2A                   | 1.4200  | C15C16                               | 1.3900  |
| O7C20 <sup>#2</sup> | 1.34(3)  | C11AC4                               | 1.42(6) | N1AC32A                  | 1.4200  | C15C21                               | 1.3900  |
| O3C12               | 1.32(3)  | C14C19                               | 1.42(3) | N1AC30                   | 1.42(5) | C16C24                               | 1.3900  |
| O6C13 <sup>#3</sup> | 1.29(5)  | C14C15                               | 1.42(3) | N2AC33A                  | 1.4200  | C24C23                               | 1.3900  |
| O2AC1 <sup>#4</sup> | 1.26(7)  | C24AC18                              | 1.3900  | C33AN3A                  | 1.4200  | C23C22                               | 1.3900  |
| O4C12               | 1.19(3)  | C24AC23A                             | 1.3900  | N3AC32A                  | 1.4200  | C22C21                               | 1.3900  |
| O2C1 <sup>#4</sup>  | 1.21(7)  | C18C19                               | 1.3900  | C13O6 <sup>#6</sup>      | 1.29(5) | C4C5                                 | 1.36(4) |
| O6AC13 <sup>3</sup> | 1.31(5)  | C19C21A                              | 1.3900  | C13O6A <sup>#6</sup>     | 1.31(5) | C31N4 <sup>#1</sup>                  | 1.33(3) |
| N2N3                | 1.37(3)  | C21AC22A                             | 1.3900  | C13C14                   | 1.51(3) | C31C30                               | 1.33(4) |
| C27N4 <sup>#1</sup> | 1.29(3)  |                                      |         |                          |         |                                      |         |
| O1Zn1O8             | 90.6(6)  | C16C17C20                            | 117(2)  | C1 <sup>#4</sup> O2 Zn1  | 148(6)  | C7 C8 C9                             | 120.0   |
| O1Zn1O2A            | 177(2)   | C3C2C1                               | 123(2)  | C13 <sup>#3</sup> O6AZn2 | 129(3)  | C8 C7 C2                             | 125(2)  |
| O1Zn1O2             | 173(2)   | C3C2C7                               | 119(2)  | C25 N2 N3                | 103(2)  | C8 C7 C6                             | 120.0   |
| O1Zn1N4             | 92.0(7)  | C7C2C1                               | 118(2)  | N2 N3 C28                | 121(2)  | C6 C7 C2                             | 115(2)  |
| O8Zn1O2A            | 93(2)    | N1C26N3                              | 105(2)  | N2 N3 C26                | 109(2)  | C11 C6 C7                            | 120.0   |
| O8Zn1O2             | 83(2)    | C28C29C30                            | 112(2)  | C28 N3 C26               | 129(2)  | C5 C6 C7                             | 126(2)  |
| O8Zn1N4             | 145.9(7) | C2C3C4                               | 120(3)  | C27 <sup>#5</sup> N4 Zn1 | 119(2)  | C5 C6 C11                            | 114(2)  |
| O7Zn1O1             | 92.4(6)  | C2C3C8A                              | 124(3)  | C27 <sup>#5</sup> N4C315 | 120(2)  | C6C11C10                             | 120.0   |
| O7Zn1O8             | 104.1(6) | C4C3C8A                              | 114(3)  | C31 <sup>#5</sup> N4Zn1  | 121(2)  | C11C10C9                             | 120.0   |
| O7Zn1O2A            | 87(2)    | O1C1C2                               | 120(2)  | C25N1Zn2                 | 127(2)  | O8 <sup>#5</sup> C20O7 <sup>#8</sup> | 121(2)  |
| O7Zn1O2             | 90(2)    | O2A <sup>#7</sup> C1O1               | 126(4)  | C26N1Zn2                 | 124(2)  | O8 <sup>#5</sup> C20C17              | 119(2)  |
| O7Zn1N4             | 109.8(7) | O2A <sup>#7</sup> C1C2               | 115(4)  | C26N1C25                 | 108(2)  | O7 <sup>#8</sup> C20C17              | 120(2)  |
| O2AZn1O2            | 10(3)    | O2 <sup>#7</sup> C1O1                | 121(4)  | N5N6C33                  | 108.0   | O3C12C5                              | 116(2)  |
| O2AZn1N4            | 85(2)    | O2 <sup>#7</sup> C1O2A <sup>#7</sup> | 17(5)   | C32N5N6                  | 108.0   | O4C12O3                              | 123(2)  |
| O2Zn1N4             | 93(2)    | O2 <sup>#7</sup> C1C2                | 117(4)  | C30N5N6                  | 125(4)  | O4C12C5                              | 121(3)  |

|                         |          |             |        |                                       |        |                        |        |
|-------------------------|----------|-------------|--------|---------------------------------------|--------|------------------------|--------|
| O5Zn2O6                 | 105(2)   | C10AC11A C4 | 126(5) | C30N5C32                              | 127(4) | C16C15C14              | 116(2) |
| O5Zn2O6A                | 98(1)    | C19C14C13   | 118(2) | N5C32N7                               | 108.0  | C16C15C21              | 120.0  |
| O5Zn2N1                 | 117.7(8) | C15C14C13   | 116(2) | C32N7C33                              | 108.0  | C21C15C14              | 124(2) |
| O3Zn2O5                 | 108.7(8) | C15C14C19   | 126(2) | N7C33N6                               | 108.0  | C15C16C17              | 119(2) |
| O3Zn2O6                 | 106(1)   | C18C24AC23A | 120.0  | N2AN1AC32A                            | 108.0  | C24C16C17              | 122(2) |
| O3Zn2O6A                | 120(1)   | C24AC18C17  | 124(2) | N2AN1AC30                             | 126(3) | C24C16C15              | 120.0  |
| O3Zn2N1                 | 104.3(8) | C19C18C17   | 116(2) | C32AN1AC30                            | 121(3) | C16C24C23              | 120.0  |
| O5Zn2O6                 | 105(2)   | C10AC11AC4  | 126(5) | C33AN2AN1A                            | 108.0  | C22C23C24              | 120.0  |
| O5Zn2O6A                | 98(1)    | C19C14C13   | 118(2) | N3AC33AN2A                            | 108.0  | C23C22C21              | 120.0  |
| O5Zn2N1                 | 117.7(8) | C15C14C13   | 116(2) | C32AN3AC33                            | 108.0  | C22C21C15              | 120.0  |
| A                       |          |             |        |                                       |        |                        |        |
| O3Zn2O5                 | 108.7(8) | C15C14C19   | 126(2) | N3AC32AN1A                            | 108.0  | C11AC4C3               | 117(3) |
| O3Zn2O6                 | 106(1)   | C18C24AC23A | 120.0  | O5C13O6 <sup>#6</sup>                 | 120(3) | C5C4C3                 | 120(3) |
| O3Zn2O6A                | 120(1)   | C24AC18C17  | 124(2) | O5C13O6A <sup>#6</sup>                | 119(3) | C5C4C11A               | 121(3) |
| O3Zn2N1                 | 104.3(8) | C19C18C17   | 116(2) | O5C13C14                              | 115(2) | C30C31N4 <sup>#1</sup> | 122(3) |
| O6Zn2O6A                | 14(2)    | C19C18C24A  | 120.0  | O6 <sup>#6</sup> C13O6A <sup>#6</sup> | 21(2)  | C6C5C12                | 120(2) |
| O6Zn2N1                 | 114(2)   | C18C19C14   | 118(2) | O6 <sup>#6</sup> C13C14               | 124(3) | C6C5C4                 | 118(2) |
| O6AZn2N1                | 109(1)   | C18C19C21A  | 120.0  | O6A <sup>#6</sup> C13C14              | 124(3) | C4C5C12                | 122(2) |
| C1O1Zn1                 | 133(2)   | C21AC1914   | 121(2) | N2C25N1                               | 115(2) | N5C30C29               | 122(3) |
| C20 <sup>#1</sup> O8Zn1 | 104(2)   | C22AC21AC19 | 120.0  | N4 <sup>#1</sup> C27C28               | 122(2) | N5C30C31               | 116(3) |
| C13O5Zn2                | 121(2)   | C21AC22AC23 | 120.0  | N3C28C27                              | 118(2) | N1AC30C29              | 111(3) |
| A                       |          |             |        |                                       |        |                        |        |
| C20 <sup>#2</sup> O7Zn1 | 120(1)   | C22AC23AC24 | 120.0  | C29C28N3                              | 119(2) | C31C30N1A              | 127(3) |
| A                       |          |             |        |                                       |        |                        |        |
| C12O3Zn2                | 113(2)   | C8AC9AC10A  | 120(5) | C29C28C27                             | 122(2) | C31C30C29              | 120(3) |
| C13 <sup>#3</sup> O6Zn2 | 131(3)   | C11AC10AC9A | 119(5) | C18C17C20                             | 118(2) | C9AC8AC3               | 122(5) |
| C1 <sup>#4</sup> O2AZn1 | 143(5)   | C8C9C10     | 120.0  | C16C17C18                             | 125(2) |                        |        |

Symmetry transformation: <sup>#1</sup>1-X,-1/2+Y,1/2-Z; <sup>#2</sup>1/2-X,2-Y,-1/2+Z; <sup>#3</sup>-1/2+X,3/2-Y,1-Z; <sup>#4</sup>-1/2+X,3/2-Y,-Z; <sup>#5</sup>1-X,1/2+Y,1/2-Z; <sup>#6</sup>1/2+X,3/2-Y,1-Z; <sup>#7</sup>1/2+X,3/2-Y,-Z; <sup>#8</sup>1/2-X,2-Y,1/2+Z.

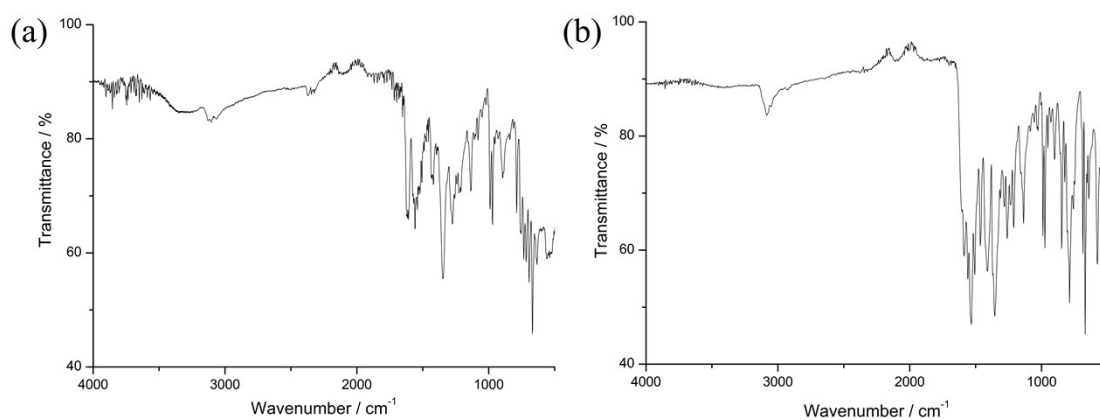

Fig. S1 IR spectra of Zn-1 (a) and Zn-2 (b) .

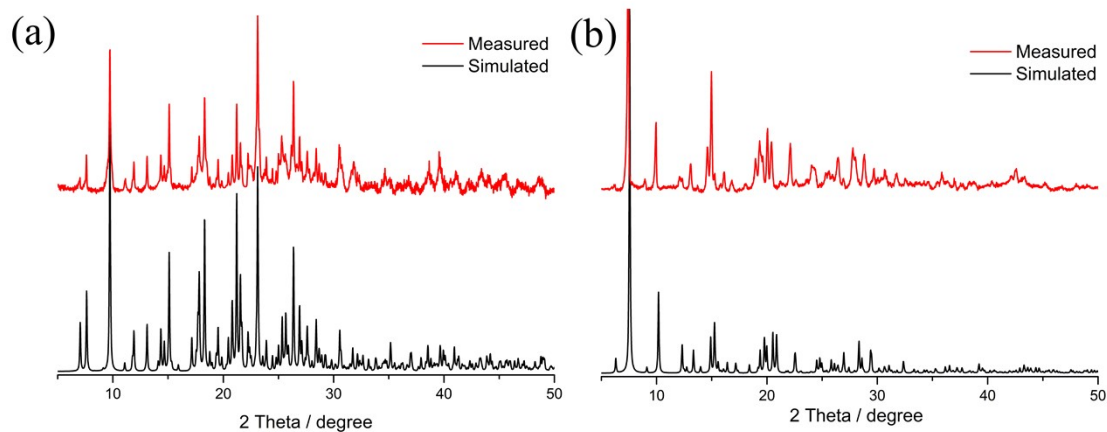

Fig. S2 PXRD profiles for Zn-1 and Zn-2. Simulated spectrum was calculated from the single crystal data.

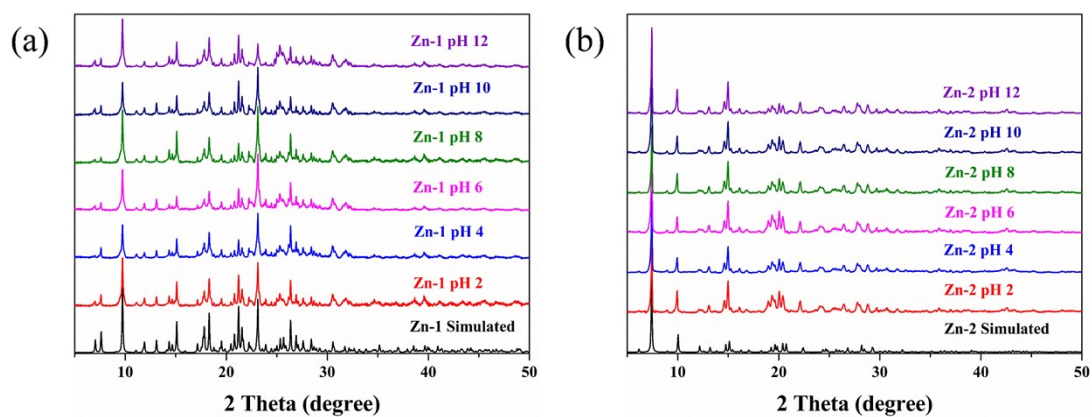

Fig. S3 PXRD patterns of Zn-1 (a) and Zn-2 (b) in an aqueous suspensions with the pH value ranging from 2 to 12.

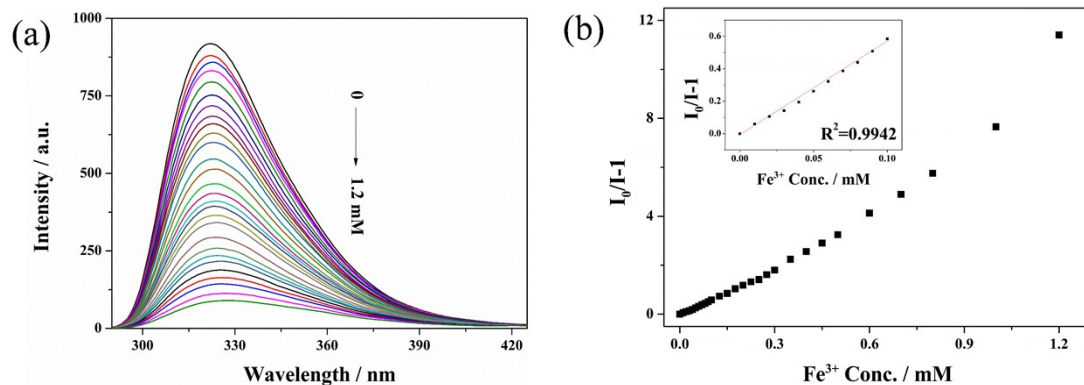

Fig. S4 Fluorescence intensities of Zn-1 (a) dispersed in different concentrations of  $\text{Fe}^{3+}$ ; the plot of  $I_0/I-1$  of Zn-1 (b) vs. concentration of  $\text{Fe}^{3+}$  in aqueous solution (Insert: The plot of  $I_0/I-1$  of the MOFs with the concentration over a  $\text{Fe}^{3+}$  concentration range of 0-0.1 mM in aqueous solution).

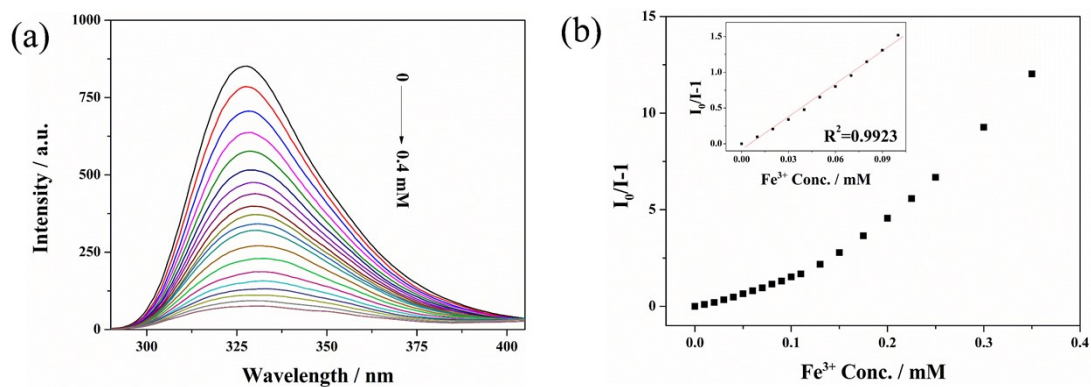

**Fig. S5** Fluorescence intensities of **Zn-2** (a) dispersed in different concentrations of Fe<sup>3+</sup>; the plot of  $I_0/I - 1$  of **Zn-2** (b) vs. concentration of Fe<sup>3+</sup> in aqueous solution (Insert: The plot of  $I_0/I - 1$  of the MOFs with the concentration over a Fe<sup>3+</sup> concentration range of 0-0.1 mM in aqueous solution).

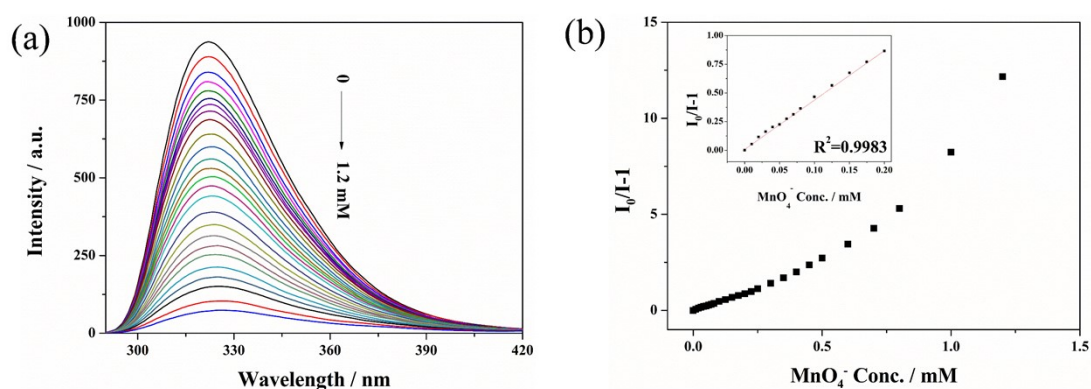

**Fig. S6** Fluorescence intensities of **Zn-1** (a) dispersed in different concentrations of MnO<sub>4</sub><sup>-</sup>; the plot of  $I_0/I - 1$  of **Zn-1** (b) vs. concentration of MnO<sub>4</sub><sup>-</sup> in aqueous solution (Insert: The plot of  $I_0/I - 1$  of the MOF with the concentration over a MnO<sub>4</sub><sup>-</sup> concentration range of 0 - 0.2 mM in aqueous solution).

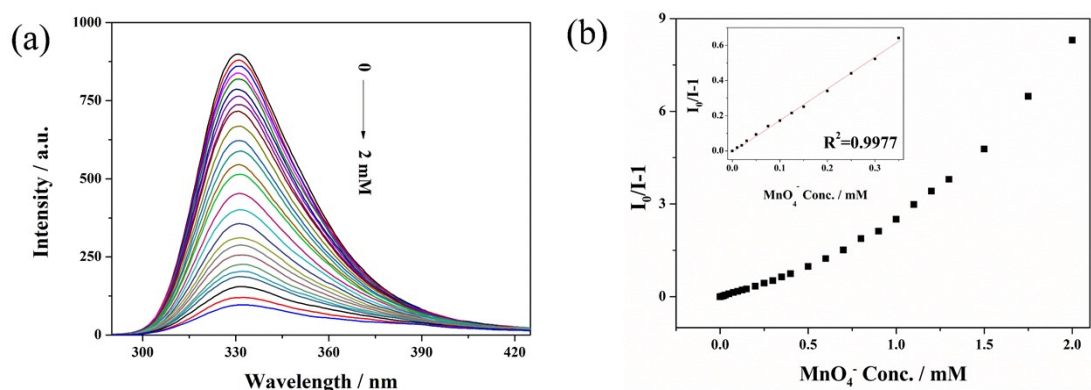

**Fig. S7** Fluorescence intensities of **Zn-2** (a) dispersed in different concentrations of MnO<sub>4</sub><sup>-</sup>; The plot of  $I_0/I - 1$  of **Zn-2** (b) vs. concentration of MnO<sub>4</sub><sup>-</sup> in aqueous solution (Insert: The plot of  $I_0/I - 1$  of the MOF with the concentration over a MnO<sub>4</sub><sup>-</sup> concentration range of 0 - 0.35 mM in aqueous solution).

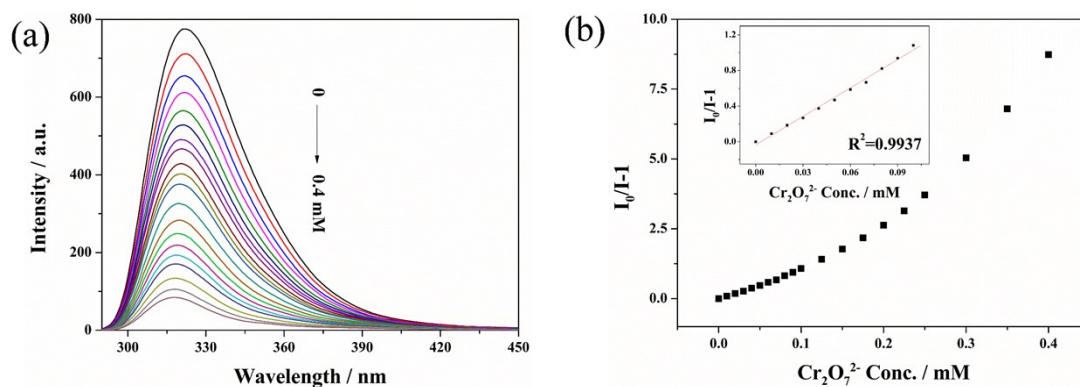

**Fig. S8** Fluorescence intensities of **Zn-1** (a) dispersed in different concentrations of  $\text{Cr}_2\text{O}_7^{2-}$ ; the plot of  $I_0/I - 1$  of **Zn-1** (b) vs. concentration of  $\text{Cr}_2\text{O}_7^{2-}$  in aqueous solution (Insert: The plot of  $I_0/I - 1$  of the MOFs with the concentration over a  $\text{Cr}_2\text{O}_7^{2-}$  concentration range of 0-0.1 mM in aqueous solution).

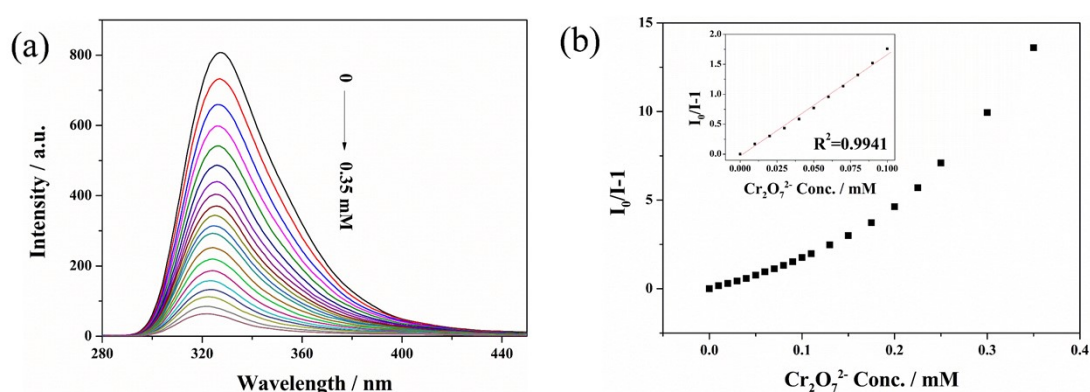

**Fig. S9** Fluorescence intensities of **Zn-2** (a) dispersed in different concentrations of  $\text{Cr}_2\text{O}_7^{2-}$ ; the plot of  $I_0/I - 1$  of **Zn-2** (b) vs. concentration of  $\text{Cr}_2\text{O}_7^{2-}$  in aqueous solution (Insert: The plot of  $I_0/I - 1$  of the MOFs with the concentration over a  $\text{Cr}_2\text{O}_7^{2-}$  concentration range of 0-0.1 mM in aqueous solution).

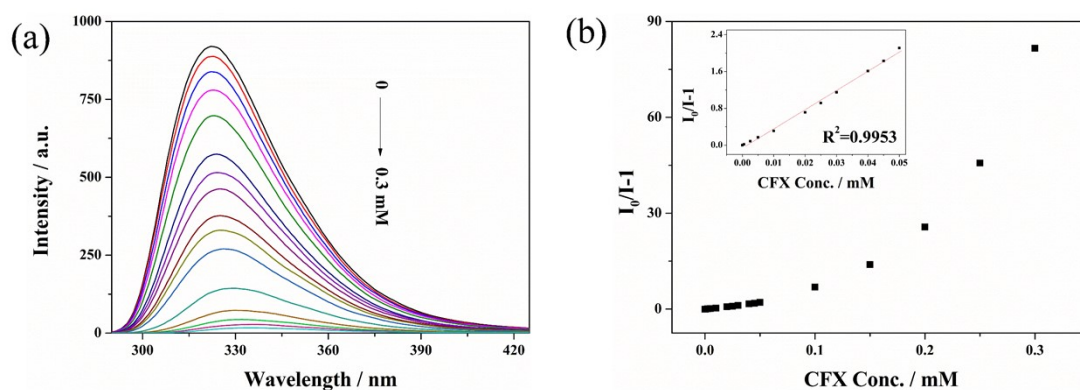

**Fig. S10** Fluorescence intensities of **Zn-1** (a) dispersed in different concentrations of CFX; the plot of  $I_0/I - 1$  of **Zn-1** (b) vs. concentration of CFX in aqueous solution (Insert: The plot of  $I_0/I - 1$  of the MOF with the concentration over a CFX concentration range of 0 - 0.05 mM in aqueous solution).



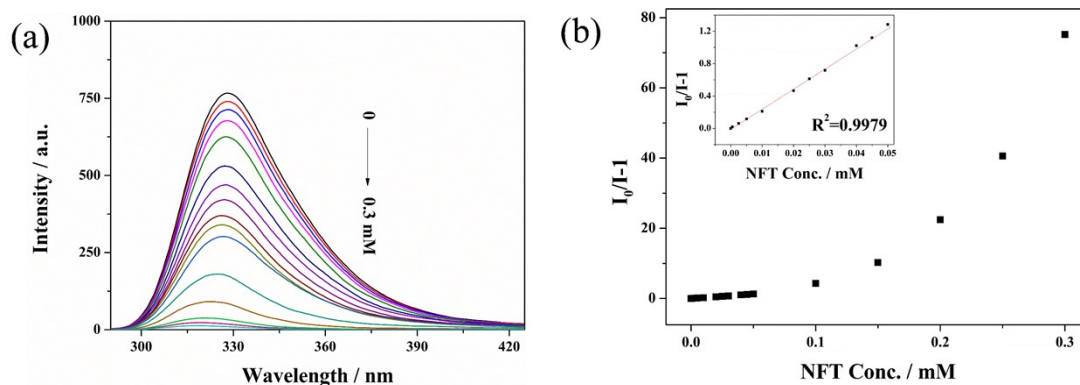

**Fig. S11** Fluorescence intensities of **Zn-2** (a) dispersed in different concentrations of NFT; the plot of  $I_0/I - 1$  of **Zn-2** (b) vs. concentration of NFT in aqueous solution (Insert: The plot of  $I_0/I - 1$  of the MOF with the concentration over a NFT concentration range of 0 - 0.05 mM in aqueous solution).

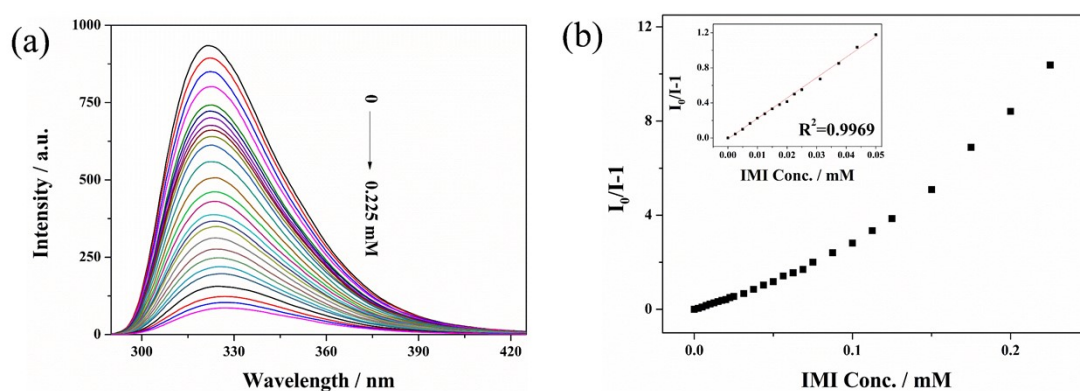

**Fig. S12** Fluorescence intensities of **Zn-1** (a) dispersed in different concentrations of IMI; the plot of  $I_0/I - 1$  of **Zn-1** (b) vs. concentration of IMI in aqueous solution (Insert: The plot of  $I_0/I - 1$  of the MOF with the concentration over a IMI concentration range of 0 - 0.05 mM in aqueous solution).

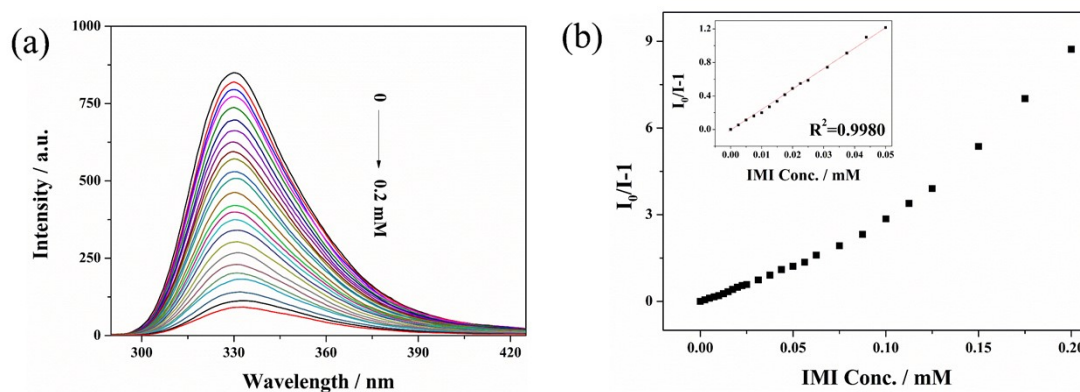

**Fig. S13** Fluorescence intensities of **Zn-2** (a) dispersed in different concentrations of IMI; the plot of  $I_0/I - 1$  of **Zn-2** (b) vs. concentration of IMI in aqueous solution (Insert: The plot of  $I_0/I - 1$  of the MOF with the concentration over a IMI concentration range of 0 - 0.05 mM in aqueous solution).

**Table S4** Ksv and LOD values of **Zn-1** and **Zn-2** for the ions detection

| Sensor | Analyte          | Concentration / $\text{mg} \cdot \text{mL}^{-1}$ | Linear range / $\mu\text{M}$ | LOD / $\mu\text{M}$ | $\text{Ksv} \times 10^4 / \text{M}^{-1}$ |
|--------|------------------|--------------------------------------------------|------------------------------|---------------------|------------------------------------------|
| Zn-1   | $\text{Fe}^{3+}$ | 0.1                                              | 0-100                        | 1.10                | 0.70                                     |
| Zn-2   | $\text{Fe}^{3+}$ | 0.1                                              | 0-100                        | 0.50                | 1.53                                     |
| Zn-1   | $\text{MnO}_4^-$ | 0.1                                              | 0-200                        | 3.32                | 0.23                                     |



|      |                                              |     |       |      |      |
|------|----------------------------------------------|-----|-------|------|------|
| Zn-2 | MnO <sub>4</sub> <sup>-</sup>                | 0.1 | 0-350 | 4.30 | 0.18 |
| Zn-3 | Cr <sub>2</sub> O <sub>7</sub> <sup>2-</sup> | 0.1 | 0-100 | 0.72 | 1.07 |
| Zn-2 | Cr <sub>2</sub> O <sub>7</sub> <sup>2-</sup> | 0.1 | 0-100 | 0.44 | 1.73 |

**Table S5** Chemical structure of the selected antibiotics

| Kind            | Name (abbreviation)              | Chemical structure                                                                   |
|-----------------|----------------------------------|--------------------------------------------------------------------------------------|
| Lactams         | Benzylopenicillin potassium (PK) | 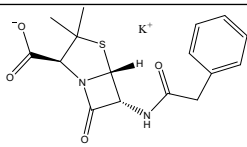   |
|                 | Penicillin V potassium (PVK)     |    |
|                 | Amoxicillin (AML)                |    |
|                 | Cefixime (CFX)                   |   |
| Aminoglycosides | Gentamicin (GTM)                 |  |
|                 | Kanamycin (KNM)                  |  |
|                 | Tobramycin (TOB)                 |  |

Streptomycin (SM)

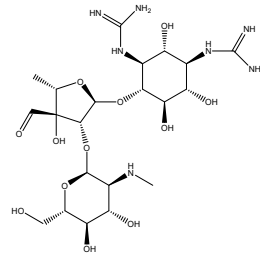

Chloramphenicols

Chloramphenicol (CAP)

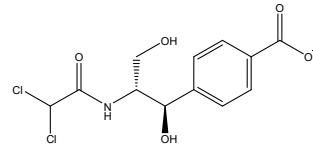

Thiamphenicol (TAP)

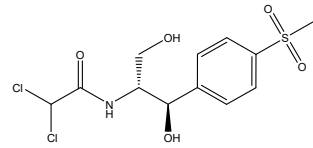

Macrolides

Roxithromycin (ROX)

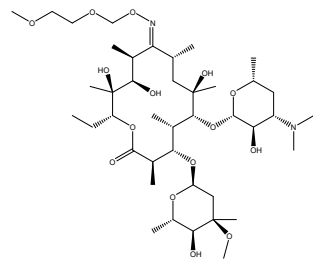

Azithromycin (AZM)

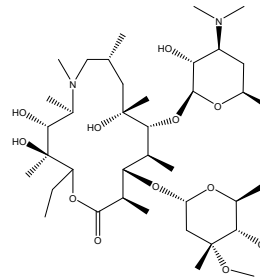

Nitrofurans

Nitrofurantoin (NFT)

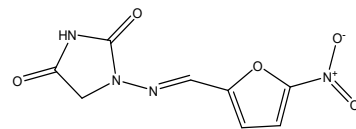

Nitrofurazone (NFZ)

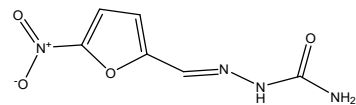

Nitroimidazoles

Metronidazole (MNZ)

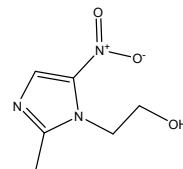

1,2-dimethyl-5-nitroimidazole (DMZ)

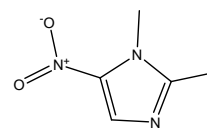

Sulfonamides

Sulfamethazine (SMZ)

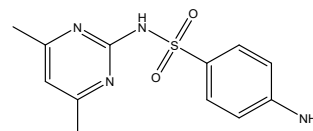

**Table S6** Chemical structure of the selected pesticides

| Name (abbreviation)                    | Chemical structure                                                                   |
|----------------------------------------|--------------------------------------------------------------------------------------|
| Dipterex (DIP)                         | 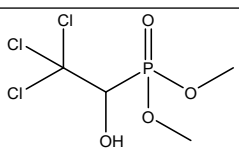   |
| Pentachloro-nitrobenzene (PCNB)        |    |
| Imazalil (IMZ)                         |    |
| Glyphosate (GLY)                       |    |
| Chlorothalonil (TPN)                   |   |
| Carbendazim (CAR)                      |  |
| 2,4-dichlorophenoxyacetic acid (2,4-D) |  |
| Imidacloprid (IMI)                     |  |
| Metamitron (MMT)                       |  |
| Thiophanate-methyl (TPM)               |  |

Nitenpyram (NTP)

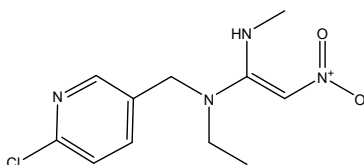**Table S7** K<sub>sv</sub> and LOD values for recently reported lanthanide MOF-based luminescence probes for sensing of NFT and CFX

| Sensor                                                                                                                                                                                                          | Analyte | Concentration / mg·mL <sup>-1</sup> | Linear range / μM | LOD / μM | K <sub>sv</sub> × 10 <sup>4</sup> / M <sup>-1</sup> | Ref.          |
|-----------------------------------------------------------------------------------------------------------------------------------------------------------------------------------------------------------------|---------|-------------------------------------|-------------------|----------|-----------------------------------------------------|---------------|
| <b>Zn-1</b>                                                                                                                                                                                                     |         | 0.1                                 | 0-50              | 0.18     | 4.14                                                | This work     |
| Zn-PDC/Tb <sup>3+</sup>                                                                                                                                                                                         | CFX     | 1.0                                 | 0-10              | 0.14     | 11                                                  | <sup>1</sup>  |
| RhB@Tb-dcpcpt                                                                                                                                                                                                   |         | 1.0                                 | 0-100             | 1.579    | 1.67                                                | <sup>2</sup>  |
| Cd-MOF/Tb <sup>3+</sup>                                                                                                                                                                                         |         | 0.1                                 | 0-6.5             | 0.0267   | 6.16                                                | <sup>3</sup>  |
| MIP@TbMOF-76                                                                                                                                                                                                    |         | -                                   | 1.76-198          | 48.5     | -                                                   | <sup>4</sup>  |
| <b>Zn-2</b>                                                                                                                                                                                                     |         | 0.1                                 | 0-50              | 0.28     | 2.74                                                | This work     |
| §[Zn(TTPBA-4) <sub>0.5</sub> (TPA)]·H <sub>2</sub> O·0.5DMF <sub>n</sub>                                                                                                                                        | NFT     | -                                   | 0-10              | -        | 2.0                                                 | <sup>5</sup>  |
| §[Zn(L)]·CH <sub>3</sub> CN <sub>n</sub>                                                                                                                                                                        |         | 0.6                                 | -                 | 3.28     | 248                                                 | <sup>6</sup>  |
| RhB@ZIF-8                                                                                                                                                                                                       |         | 0.8                                 | 0-38              | 0.47     | 1.8                                                 | <sup>7</sup>  |
| FSS@ZIF-8                                                                                                                                                                                                       |         | 0.8                                 | 0-38              | 0.35     | 2.0                                                 | <sup>8</sup>  |
| §[Zn <sub>2</sub> (TRZ) <sub>2</sub> (DBTDC-O <sub>2</sub> )]·DMAC <sub>n</sub>                                                                                                                                 |         | 1.0                                 | 4-20              | 0.353    | 18                                                  | <sup>9</sup>  |
| [(Zn <sub>4</sub> O) <sub>2</sub> (PDDA) <sub>6</sub> (H <sub>2</sub> O) <sub>2</sub> ]·10DMF                                                                                                                   |         | 0.1                                 | 0-50              | -        | 11.6                                                | <sup>10</sup> |
| [Zn <sub>8</sub> (C <sub>5</sub> H <sub>4</sub> N <sub>5</sub> ) <sub>4</sub> (C <sub>14</sub> H <sub>8</sub> O <sub>4</sub> ) <sub>6</sub> O(C <sub>50</sub> H <sub>44</sub> N <sub>4</sub> ) <sub>0.5</sub> ] |         | 0.5                                 | -                 | 0.563    | 4.42                                                | <sup>11</sup> |
| §[Zn(tptc) <sub>0.5</sub> (bimb)]·H <sub>2</sub> O <sub>n</sub>                                                                                                                                                 |         | 0.5                                 | -                 | 0.49     | 4.51                                                | <sup>12</sup> |
| [Zn(DCPP)(H <sub>2</sub> O)]·(DMF)                                                                                                                                                                              |         | 0.33                                | 0-120             | 0.14     | 6.42                                                | <sup>13</sup> |

**Table S8** K<sub>sv</sub> and LOD values for recently reported MOF-based luminescence probes for IMI

| Sensor      | Analyte | Concentration / mg·mL <sup>-1</sup> | Linear range / μM | LOD / μM | K <sub>sv</sub> × 10 <sup>4</sup> / M <sup>-1</sup> | Ref.      |
|-------------|---------|-------------------------------------|-------------------|----------|-----------------------------------------------------|-----------|
| <b>Zn-1</b> | IMI     | 0.1                                 | 0-50              | 0.35     | 2.16                                                | This work |
| <b>Zn-2</b> | IMI     | 0.1                                 | 0-50              | 0.31     | 2.49                                                | This work |

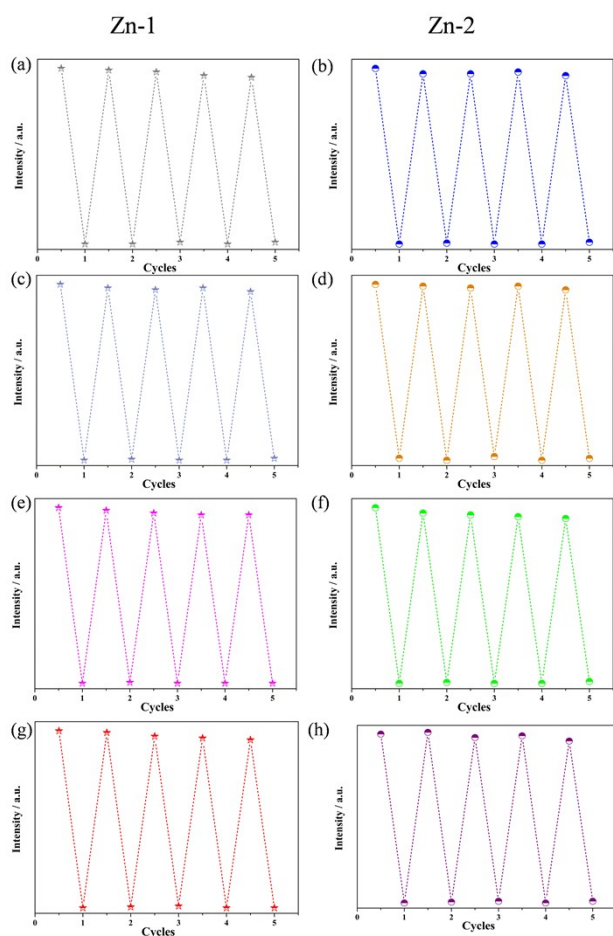

**Fig. S14** Recyclability of the CPs implemented with 1 mM of the analytes (**Zn-1**: (a)  $\text{Fe}^{3+}$ , (c)  $\text{MnO}_4^-$ , (e)  $\text{Cr}_2\text{O}_7^{2-}$ , (g) CFX and **Zn-2**: (b)  $\text{Fe}^{3+}$ , (d)  $\text{MnO}_4^-$ , (f)  $\text{Cr}_2\text{O}_7^{2-}$ , (h) NFT) in aqueous solution.

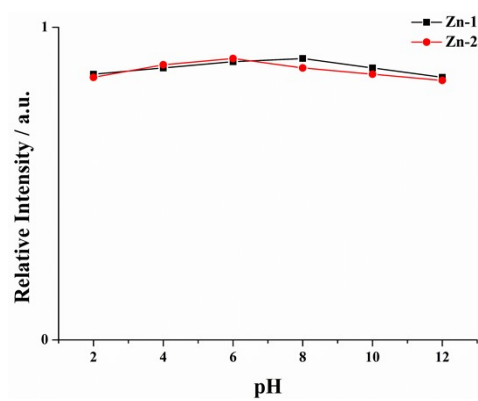

**Fig. S15** The fluorescence intensity of **Zn-1** and **Zn-2** under different pHs.

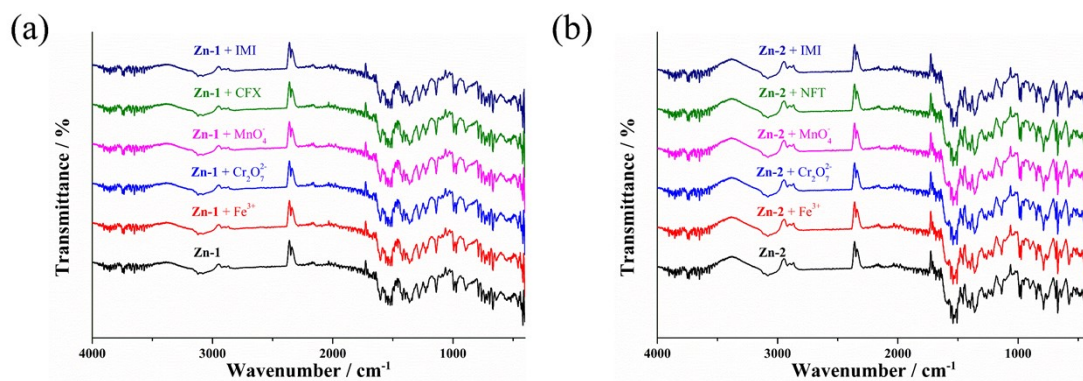

Fig. S16 Comparison before and after adding test substance of FT-IR spectra of Zn-1 (a) and Zn-2 (b).

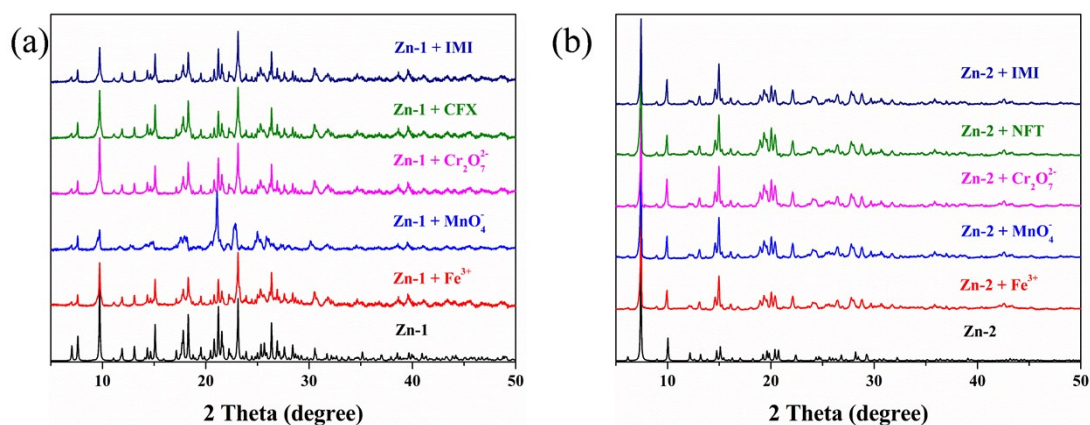

Fig. S17 Comparison before and after adding test substance of p-XRD patterns of Zn-1 (a) and Zn-2 (b).

## References

1. H. Pan, S. Wang, X. Dao and Y. Ni, *Inorg. Chem.*, **2018**, 57 (3), 1417-1425.
2. M. Yu, Y. Xie, X. Wang, Y. Li and G. Li, *ACS Appl. Mater. Inter.*, **2019**, 11 (23), 21201-21210.
3. G. Qin, J. Wang, L. Li, F. Yuan, Q. Zha, W. Bai and Y. Ni, *Talanta*, **2021**, 221, 121421.
4. H. Eskandari, M. Amirzehni, H. Asadollahzadeh, J. Hassanzadeh and P. A. Eslami, *Sens. Actuators, B. Chem.*, **2018**, 275, 145-154.
5. H.B. Zhu, Y. Shen, Z.Z. Fu, Y.Y. Yu, Y.F. Jiang and Y. Zhao, *Inorg. Chem. Commun.*, **2019**, 103, 21-24.
6. J. Li, T.J. Chen, S. Han and L.F. Song, *J. Solid State Chem.*, **2019**, 277, 107-114.
7. Y. Q. Zhang, X. H. Wu, S. Mao, W. Q. Tao and Z. Li, *Talanta*, **2019**, 204, 344-352.
8. H. He, Q.Q. Zhu, C.P. Li and M. Du, *Cryst. Growth Des.*, **2018**, 19 (2), 694-703.
9. H. He, Q.Q. Zhu, M.T. Guo, Q.S. Zhou, J. Chen, C.P. Li and M. Du, *Cryst. Growth Des.*, **2019**, 19 (9), 5228-5236.
10. Y.M. Ying, C.L. Tao, M. Yu, Y. Xiong, C.R. Guo, X.G. Liu and Z. Zhao, *J. Mater. Chem. C*, **2019**, 7 (27), 8383-8388.
11. L. Fan, F. Wang, D. Zhao, Y. Peng, Y. Deng, Y. Luo and X. Zhang, *Appl. Organomet. Chem.*, **2020**, 34 (12), e5960.
12. S.L. Sun, X.Y. Sun, Q. Sun and E.Q. Gao, *CrystEngComm*, **2021**, 23 (17), 3167-3174.
13. J. Wang, Q. Zha, G. Qin and Y. Ni, *Talanta*, **2020**, 211, 120742.
